# Supplementary material for: Device-Controlled Microcondensation for Spatially Confined On-Tissue Digests in MALDI Imaging of N-Glycans
Source: MDPI journal article supplement (doi:10.3390/ph15111356), 2022-11-03
Supplement: s1 [file s1]

## Supporting Information

### Device-controlled microcondensation for spatially confined on-tissue digests in MALDI imaging of N-glycans

Annabelle Fülöp<sup>1,#</sup>, Christian Marsching<sup>1,#</sup>, Frederik Barka<sup>2,#</sup>, Yasemin Furtun Ucal<sup>1</sup>, Pauline Pfänder<sup>3,4</sup>, Christiane A. Opitz<sup>3,5</sup>, Günes Barka<sup>2</sup>, Carsten Hopf<sup>1,6,7\*</sup>

1 Center for Mass Spectrometry and Optical Spectroscopy (CeMOS), Mannheim University of Applied Sciences, Mannheim, Germany

2 SunChrom Wissenschaftliche Geräte GmbH, Friedrichsdorf, Germany

3 Metabolic Crosstalk in Cancer, German Consortium of Translational Cancer Research (DKTK), German Cancer Research Center (DKFZ), Heidelberg, Germany

4 Faculty of Bioscience, Heidelberg University, 69120 Heidelberg, Germany

5 Neurology Clinic and National Center for Tumor Diseases, Heidelberg, Germany

6 Medical Faculty, Heidelberg University, Heidelberg, Germany

7 Mannheim Center for Translational Neuroscience (MCTN), Mannheim, Germany

# equal contribution

\* Corresponding Author: Prof. Dr. Carsten Hopf, Email: [c.hopf@hs-mannheim.de](mailto:c.hopf@hs-mannheim.de)

|                         |                                                                                                         |     |
|-------------------------|---------------------------------------------------------------------------------------------------------|-----|
| SI Figure 1 (Figure S1) | Time-dependent stability of on-slide micro-condensation                                                 | S-2 |
| SI Figure 2 (Figure S2) | Testing the wetness on the ITO-Slide during incubation using water sensitive paper                      | S-3 |
| SI Figure 3 (Figure S3) | Schematic overview of workflow for tissue pre-measurement processing                                    | S-3 |
| SI Figure 4 (Figure S4) | H&E staining of an adjacent sagittal section of a wild-type C57BL/6N mouse brain                        | S-4 |
| SI Figure 5 (Figure S5) | Replicate I: K-Means segmentation of xenografted human U87 glioblastoma cells in CD1 nu/nu mouse brain  | S-4 |
| SI Figure 6 (Figure S6) | Replicate II: K-Means segmentation of xenografted human U87 glioblastoma cells in CD1 nu/nu mouse brain | S-5 |
| SI Figure 7 (Figure S7) | Design of digestion device for controlled temperature and humidity.                                     | S-5 |

## SI Supplementary Figures

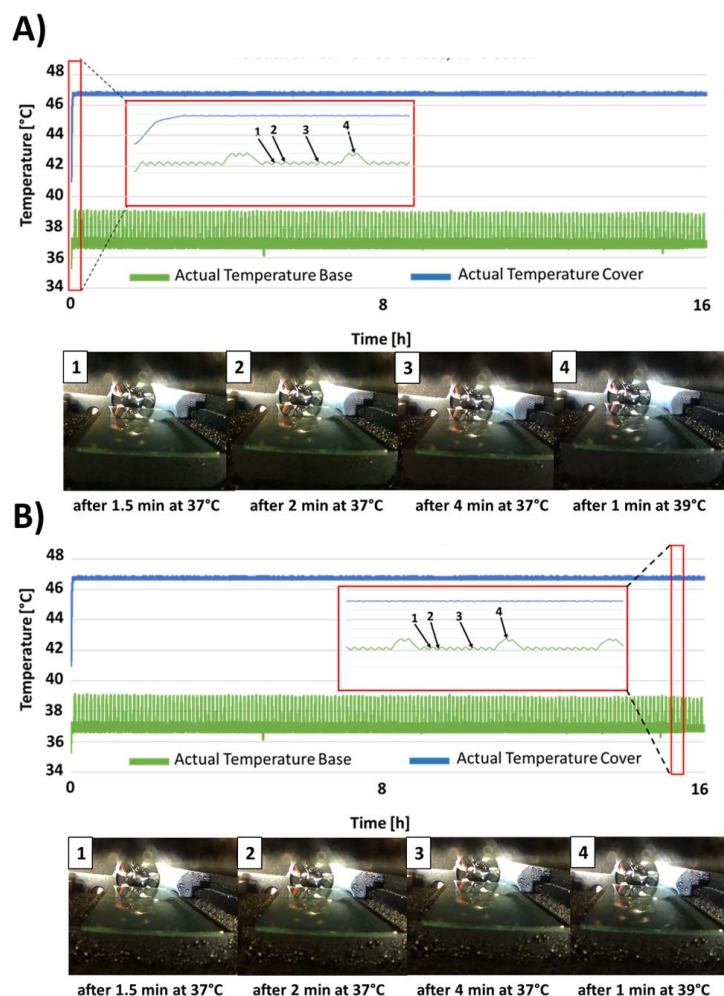

**Figure S1: Time-dependent stability of on-slide microcondensation. (a)** No difference could be seen in the resulting microcondensation evaluating the droplet layer (1-3) and the water on the slide was evaporated (4) over a time span of 15 h 30 min. **(b)** In the microcondensation step after 15 h 30 min (b), each monitored time point in a cycle gave the same results as observed in the first one starting after the initial phase of 5 min (a).

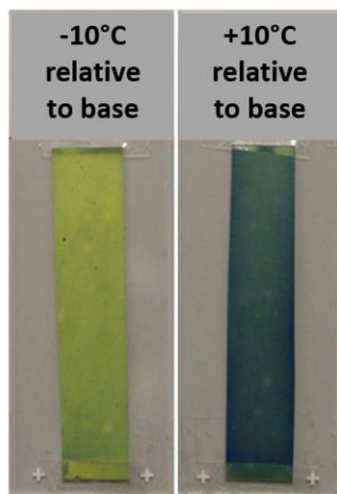

**Figure S2: Testing of wetness on the ITO-Slide during incubation using water-sensitive paper.** A temperature difference of +10°C between the base and cover of the device leads to a satisfying result. In this case (right) the strong bluish coloring indicates a higher level of condensation on the ITO-slide, compared to a temperature difference of -10°C and missing condensation on the paper (left).

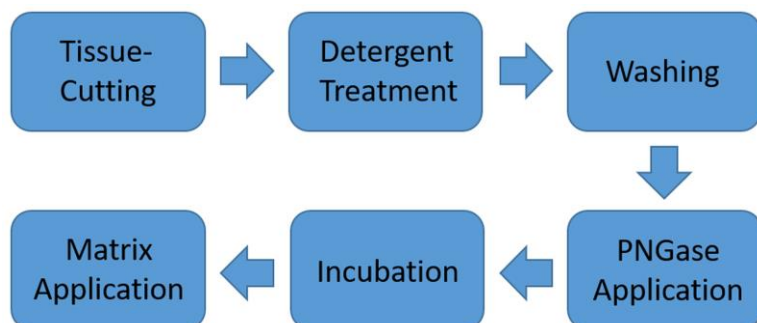

**Figure S3: Scheme of the tissue-processing workflow.** The workflow required before the analysis of N-glycan moieties with MALDI-MSI. Details of the individual steps are described in the method section.

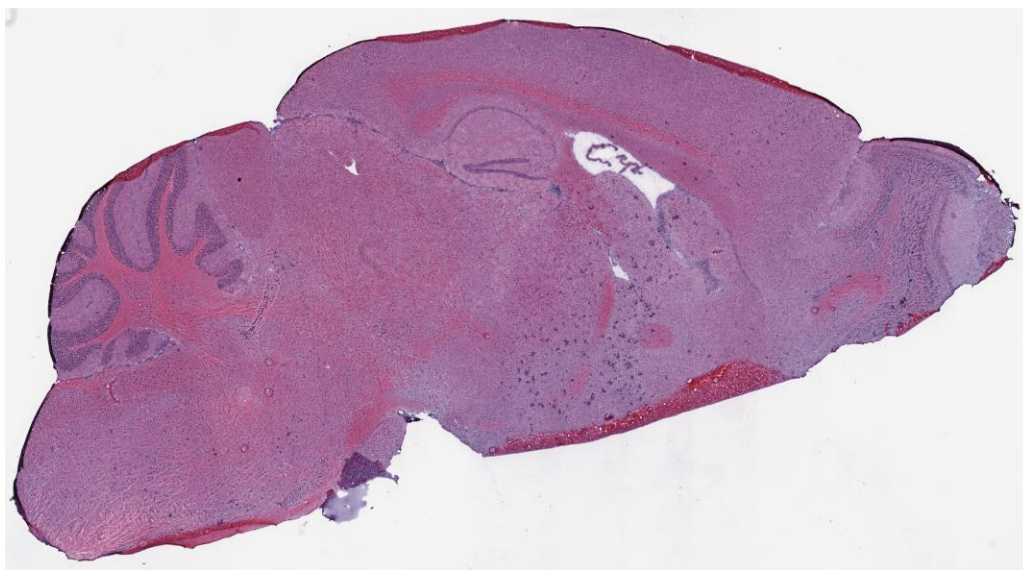

**Figure S4:** H&E staining of an adjacent sagittal section (to the sections used to map the N-glycan spatial distribution (Fig. 1)) of a wild-type C57BL/6N mouse brain.

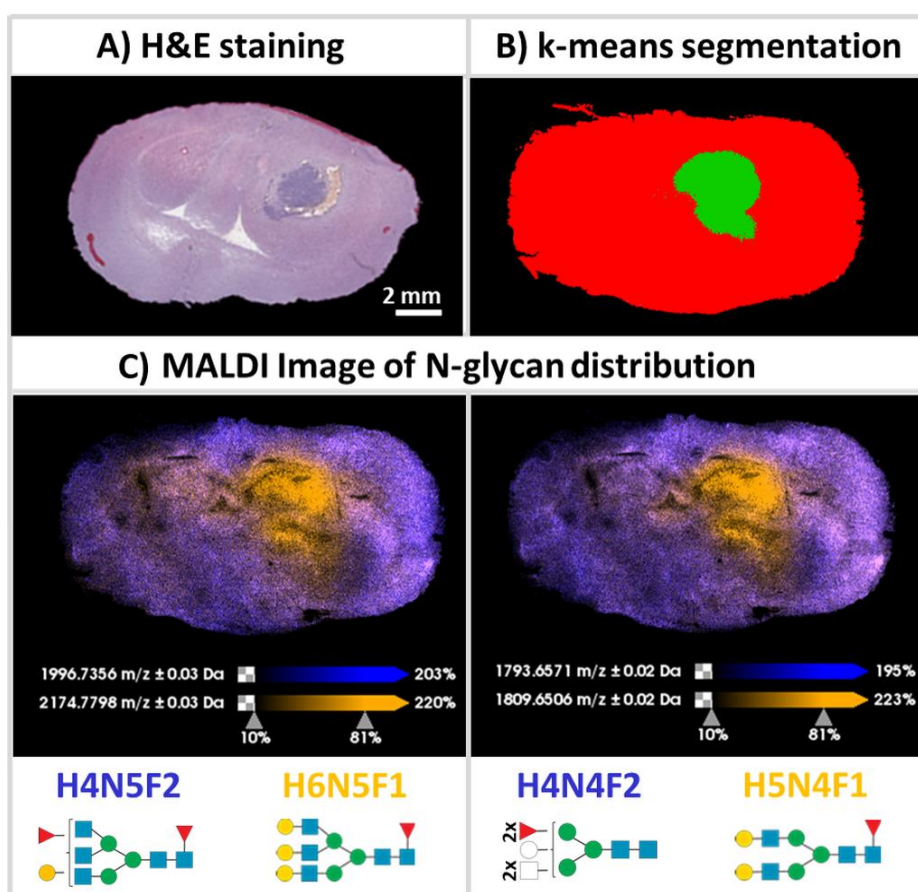

**Figure S5: First replicate of the measurement used for Fig. 2.** (a) H&E staining of an adjacent tissue section. (b) Result of k-means segmentation. (c) Orange segments indicate areas of xenograft tumor visualized by the m/z values of H5N4F1 [M+Na]<sup>+</sup> (m/z 1809.6506) or H6N5F1 [M+Na]<sup>+</sup> (m/z 2174.7798), whereas purple corresponds to the non-tumor area represented by the m/z value of H4N4F2 [M+Na]<sup>+</sup> (m/z 1793.6571) or H4N5F2 [M+Na]<sup>+</sup> (m/z 1996.7356).

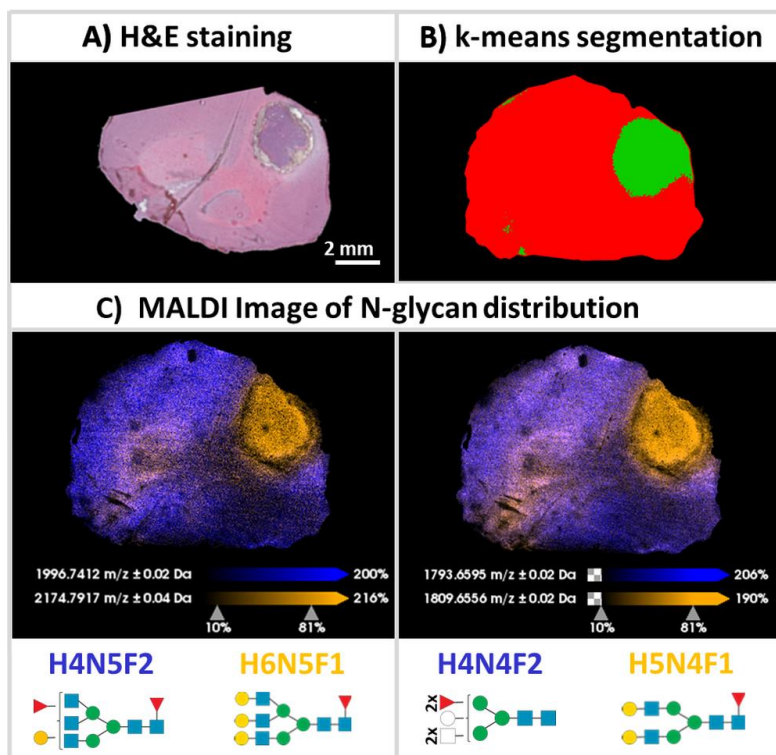

**Figure S6: Second replicate of the measurement used for Fig. 2.** (a) H&E staining of an adjacent (and slightly distorted) tissue section. (b) Result of k-means segmentation. (c) Orange segments indicate areas of xenograft tumor visualized by the m/z values of H5N4F1 [M+Na]<sup>+</sup> (m/z 1809.6556) or H6N5F1 [M+Na]<sup>+</sup> (m/z 2174.7917), whereas purple corresponds to the non-tumor area represented by the m/z value of H4N4F2 [M+Na]<sup>+</sup> (m/z 1793.6595) or H4N5F2 [M+Na]<sup>+</sup> (m/z 1996.7412).

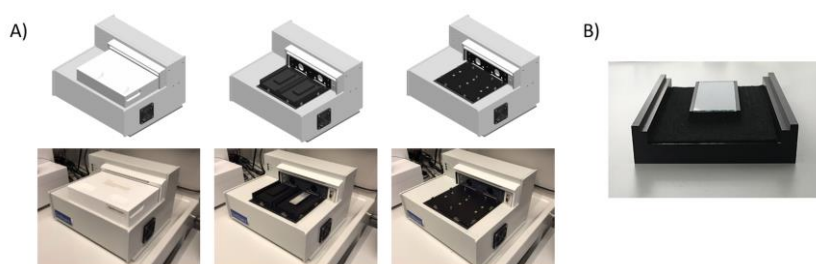

**Figure S7: SunDigest 2.0.** (a) Schematic drawing of the temperature- and humidity-controlled on-tissue digestion device and the demonstrator used in the laboratory. (b) The device contains a slide holder made of anodized aluminum.
